# Supplementary material for: Structural basis for ryanodine receptor type 2 leak in heart failure and arrhythmogenic disorders
Source: PubMed Central journal article supplement (PMC11402997; doi:10.1038/s41467-024-51791-y), 2024-09-15
Supplement: 41467_2024_51791_MOESM1_ESM.pdf [file 41467_2024_51791_MOESM1_ESM.pdf]

## Supplementary information



### Supplementary Fig. 1. Phosphorylation of residue RyR2-S2808 induces the subprimed state and post-translational modifications.

**a** Schematic equilibrium of the different conformations of RyR2. Panel adapted from Marco C. Miotto et al., Structural analyses of human ryanodine receptor type 2 channels reveal the mechanisms for sudden cardiac death and treatment. *Sci. Adv.* 8, eabo1272(2022). DOI:10.1126/sciadv.abo1272 under a CC BY license:

<https://creativecommons.org/licenses/by/4.0/>.<sup>10</sup> The conformation of the destabilized RY3&4 domain (phosphorylation domain) was modelled with Coot to illustrate our hypothesis.

**b** Close-up view of the phosphorylation loop (residues 2803-2819 modelled with Coot) of the WT RyR2 (left), PKA-phosphorylated RyR2 (middle), and RyR2-R1500A-K1525A (right).

The dashed lines represent the hydrogen and ionic bonds, and the arrows represent the expected domain movements.

**c** Immunoblots of microsomes prepared from HEK293 expressing RyR2-R1500A-K1525A treated with either 30  $\mu$ M H89 overnight or 100  $\mu$ M 8-Br-cAMP for 30 min, showing phosphorylation of residue S2808. **d,e** PKA phosphorylation fails to increase the open probability ( $P_o$ ) of single RyR2-R1500A-K1525A channels. Single-channel current recordings traces from recombinant RyR2-R1500A-K1525A at  $Ca^{2+}$  150 nM, with H89 or 8-Br-cAMP treatment.

Opening events are shown as upward deflections.  $P_o$ : opening probability,  $T_o$  : meantime open,  $T_c$  : meantime closed. **f** Immunoblots of microsomes prepared from HEK293 expressing WT RyR2 or RyR2-S2808D treated with 1 mM  $H_2O_2$  for 30 min, showing oxidation and nitrosylation of RyR2. **g** SDS-PAGE of human recombinant RyR2-S2808D purified from HEK293 cells treated with 1 mM  $H_2O_2$  for 30 min.

a

### RyR2-S2808D (H<sub>2</sub>O<sub>2</sub>)



**191,898 Particles**

Non-uniform Refinement (2.98 Å)  
Symmetry expansion (C4)

Local Refinement (big masks)  
- TaF+TM+CTD (2.81 Å)  
- JSol+CSol (2.79 Å)  
- calstabin-2 + NTD+SPRY (2.79 Å)  
- BSol (3.21 Å)

Local Refinement (small masks)  
- RY1&2 (3.36 Å)  
- RY3&4 (3.37 Å)  
- BSol2 (3.79 Å)

Composite map: human RyR2-S2808D (H<sub>2</sub>O<sub>2</sub>) in the subprimed state  
EMDB: EMD-42458  
PDB: 8UQ2



### RyR2-S2808D (H<sub>2</sub>O<sub>2</sub>) + ARM210



**83,460 Particles**

Non-uniform Refinement (3.18 Å)  
Symmetry expansion (C4)

Local Refinement (big masks)  
- TaF+TM+CTD (2.94 Å)  
- JSol+CSol (2.94 Å)  
- calstabin-2 + NTD+SPRY (2.92 Å)  
- BSol (3.55 Å)

Local Refinement (small masks)  
- RY1&2 (3.76 Å)  
- RY3&4 (3.75 Å)  
- BSol2 (4.16 Å)

Composite map: human RyR2-S2808D (H<sub>2</sub>O<sub>2</sub>) + ARM210 in the closed state  
EMDB: EMD-42459  
PDB: 8UQ3



**b RyR2-S2808D (H<sub>2</sub>O<sub>2</sub>) + NOC-12 + GSH**

13,908 Movies  
 Patch motion correction (multi)  
 Patch CTF estimation (multi)  
 Manually curate exposures  
 13,908 Micrographs  
 Template picker  
 Extract from micrographs (box size 512 pix, crop 128 pixels)  
 889,547 Particles  
 2D classification (150 classes)  
 83,074 Particles



Homogeneous Refinement  
 Heterogeneous Refinement (6 classes)

|         |         |         |
|---------|---------|---------|
| Class 0 | Class 1 | Class 2 |
|         |         |         |
| 4,540   | 7,566   | 4,257   |
| Class 3 | Class 4 | Class 5 |
|         |         |         |
| 37,559  | 12,477  | 16,675  |

Extract from micrographs (box size 512 pix)  
 Homogeneous Refinement  
 Heterogeneous Refinement (4 classes)

|                |             |             |             |
|----------------|-------------|-------------|-------------|
| Class 0 closed | Class 1 bad | Class 2 bad | Class 3 bad |
|                |             |             |             |
| 19,753         | 7,174       | 4,356       | 6,092       |

**19,753 Particles**  
 Non-uniform Refinement (3.64 Å)  
 Symmetry expansion (C4)

Local Refinement (big masks)  
 - TaF+TM+CTD (3.34 Å)  
 - JSol+CSol (3.28 Å)  
 - calstabin-2 + NTD+SPRY (3.22 Å)  
 - BSol (4.26 Å)

Local Refinement (small masks)  
 - RY1&2 (4.39 Å)  
 - RY3&4 (4.72 Å)  
 - BSol2 (5.63 Å)

Composite map: human RyR2-S2808D (H<sub>2</sub>O<sub>2</sub>)  
 + H<sub>2</sub>O<sub>2</sub> + NOC-12 + GSH in the subprimed state  
 EMDB: EMD-42460  
 PDB: 8UQ4



**RyR2-S2808D (H<sub>2</sub>O<sub>2</sub>) + Rapamycin**

18,491 Movies  
 Patch motion correction (multi)  
 Patch CTF estimation (multi)  
 Manually curate exposures  
 16,985 Micrographs  
 Template picker  
 Extract from micrographs (box size 512 pix, crop 128 pixels)  
 783,191 Particles  
 2D classification (100 classes)  
 320,951 Particles



Homogeneous Refinement  
 Heterogeneous Refinement (6 classes)

|         |         |         |         |         |         |
|---------|---------|---------|---------|---------|---------|
| Class 0 | Class 1 | Class 2 | Class 3 | Class 4 | Class 5 |
|         |         |         |         |         |         |
| 15,685  | 14,212  | 14,859  | 172,878 | 28,047  | 75,270  |

Extract from micrographs (box size 512 pix)  
 Homogeneous Refinement  
 Heterogeneous Refinement (4 classes)

|                |                |                |                |
|----------------|----------------|----------------|----------------|
| Class 0 closed | Class 1 closed | Class 2 closed | Class 3 closed |
|                |                |                |                |
| 38,840         | 24,470         | 73,393         | 35,373         |

**172,076 Particles**  
 Non-uniform Refinement (3.29 Å)

Symmetry expansion (C4)  
 688,304 Expanded Particles  
 Local Refinement (SPRYs + NSol + calstabin-2 mask)  
 3D Variability (3 modes, same mask)



Cluster 1 & 4 (conservatively chosen)  
 234,334 Expanded Particles  
 (at least 34% of expanded particles contain no calstabin-2)

Local Refinement (big masks)  
 - TaF+TM+CTD (3.32 Å)  
 - JSol+CSol (3.11 Å)  
 - NTD+SPRY (3.12 Å)  
 - BSol (3.81 Å)

Local Refinement (small masks)  
 - RY1&2 (4.02 Å)  
 - RY3&4 (4.20 Å)  
 - BSol2 (5.62 Å)

Composite map: human RyR2-S2808D (H<sub>2</sub>O<sub>2</sub>)  
 + Rapamycin in the primed state  
 EMDB: EMD-42461  
 PDB: 8UQ5

Local Refinement (four calstabin-2 mask)  
 3D Variability (4 modes, same mask)



Cluster 3 (conservatively chosen)  
**18,232 Particles**  
 (at least 10% of initial particles contain no calstabin-2)

Non-uniform Refinement (3.96 Å)



c

RyR2-R420Q



Homogeneous Refinement  
 Heterogeneous Refinement (4 classes)



Extract from micrographs (box size 512 pix)  
 Homogeneous Refinement  
 Heterogeneous Refinement (4 classes)



**143,933 Particles**

Non-uniform Refinement (2.86 Å)  
 Symmetry expansion (C4)

Local Refinement (big masks)  
 - TaF+TM+CTD (2.65 Å)  
 - JSol+CSol (2.64 Å)  
 - calstabin-2 + NTD+SPRY (2.64 Å)  
 - BSol (2.91 Å)

Local Refinement (small masks)  
 - RY1&2 (3.11 Å)  
 - RY3&4 (3.22 Å)  
 - BSol2 (3.35 Å)



Composite map: PKA-phosphorylated human RyR2-R420Q in the primed state  
 EMD: EMD-42759  
 PDB: 8UXC



RyR2-R420Q + ARM210



Homogeneous Refinement  
 Heterogeneous Refinement (4 classes)



Extract from micrographs (box size 512 pix)  
 Homogeneous Refinement  
 Heterogeneous Refinement (2 classes)



**14,924 Particles**

Non-uniform Refinement (3.53 Å)  
 Symmetry expansion (C4)

Local Refinement (big masks)  
 - TaF+TM+CTD (3.18 Å)  
 - JSol+CSol (3.10 Å)  
 - calstabin-2 + NTD+SPRY (3.15 Å)  
 - BSol (3.76 Å)

Local Refinement (small masks)  
 - RY1&2 (3.95 Å)  
 - RY3&4 (4.39 Å)  
 - BSol2 (5.02 Å)

Composite map: PKA-phosphorylated human RyR2-R420Q+ ARM210 in the closed state  
 EMD: EMD-42761  
 PDB: 8UXE



d

RyR2-R420W



Homogeneous Refinement  
 Heterogeneous Refinement (4 classes)

| Class 0 | Class 1 | Class 2 | Class 3 |
|---------|---------|---------|---------|
|         |         |         |         |
| 115,505 | 13,183  | 10,228  | 18,656  |

Extract from micrographs (box size 512 pix)  
 Homogeneous Refinement  
 Heterogeneous Refinement (4 classes)

| Class 0 closed | Class 1 closed | Class 2 bad | Class 3 bad |
|----------------|----------------|-------------|-------------|
|                |                |             |             |
| 32,235         | 70,243         | 3,877       | 8,625       |

**102,478 Particles**

Non-uniform Refinement (3.13 Å)  
 Symmetry expansion (C4)

Local Refinement (big masks)  
 - TaF+TM+CTD (2.91 Å)  
 - JSol+CSol (2.91 Å)  
 - calstabin-2 + NTD+SPRY (2.90 Å)  
 - BSol (3.13 Å)

Local Refinement (small masks)  
 - RY1&2 (3.26 Å)  
 - RY3&4 (3.42 Å)  
 - BSol2 (3.74 Å)

Composite map: PKA-phosphorlated human RyR2-R420W in the primed state  
 EMDB: EMD-42762  
 PDB: 8UXF



RyR2-R420W + ARM210



Homogeneous Refinement  
 Heterogeneous Refinement (7 classes)

| Class 0 | Class 1 | Class 2 | Class 3 |
|---------|---------|---------|---------|
|         |         |         |         |
| 9,094   | 8,690   | 10,502  | 26,915  |
| Class 4 | Class 5 | Class 6 |         |
|         |         |         |         |
| 20,828  | 110,191 | 97,328  |         |

Extract from micrographs (box size 512 pix)  
 Homogeneous Refinement  
 Heterogeneous Refinement (4 classes)

| Class 0 closed | Class 1 closed | Class 2 closed | Class 3 bad |
|----------------|----------------|----------------|-------------|
|                |                |                |             |
| 79,706         | 37,000         | 65,018         | 24,939      |

**181,724 Particles**

Non-uniform Refinement (3.08 Å)  
 Symmetry expansion (C4)

Local Refinement (big masks)  
 - TaF+TM+CTD (2.93 Å)  
 - JSol+CSol (2.97 Å)  
 - calstabin-2 + NTD+SPRY (2.91 Å)  
 - BSol (3.24 Å)

Local Refinement (small masks)  
 - RY1&2 (3.38 Å)  
 - RY3&4 (3.19 Å)  
 - BSol2 (3.29 Å)

Composite map: PKA-phosphorlated human RyR2-R420W + ARM210 in the closed state  
 EMDB: EMD-42763  
 PDB: 8UXG



e

### RyR2-R420W + Ca<sup>2+</sup>



f

RyR2-R420W + Ca<sup>2+</sup> + CaM

**Supplementary Fig. 2. Cryo-EM data processing. a-f** Entire cryoSPARC processing of the cryo-EM datasets to obtain final composite maps of RyR2-S2808D, RyR2-R420Q, and RyR2-R420W variants in the different conditions and states. The number of particles and the resolution achieved for each refinement are shown for each step. The masks used are shown only in **a** but are identical in all processing procedures, except those including calstabin-2 (**b**) and CaM (**f**).

a

human RyR2-S2808D ( $H_2O_2$ ) in the subprimed state (PDB: 8UQ2)



human RyR2-S2808D ( $H_2O_2$ ) + ARM210 in the closed state (PDB: 8UQ3)



human RyR2-S2808D ( $H_2O_2$ ) +  $H_2O_2$ /NOC-12/GSH in the subprimed state (PDB: 8UQ4)



human RyR2-S2808D ( $H_2O_2$ ) +  $H_2O_2$ /NOC-12/GSH + Rapamycin in the primed state (PDB: 8UQ5)



b

PKA-phosphorylated human RyR2-R420Q in the primed state (PDB: 8UXC)



PKA-phosphorylated human RyR2-R420Q + ARM210 in the closed state (PDB: 8UXE)



PKA-phosphorylated human RyR2-R420W in the primed state (PDB: 8UXF)



PKA-phosphorylated human RyR2-R420W in the closed state (PDB: 8UXG)



c

PKA-phosphorylated human RyR2-R420W + Ca<sup>2+</sup> in the primed state (PDB: 8UXH)



PKA-phosphorylated human RyR2-R420W + Ca<sup>2+</sup> in the open state (PDB: 8UXI)



PKA-phosphorylated human RyR2-R420W + Ca<sup>2+</sup> + CaM in the primed state (PDB: 8UXL)



PKA-phosphorylated human RyR2-R420W + Ca<sup>2+</sup> + CaM in the open state (PDB: 8UXM)



**Supplementary Fig. 3. FSC curves.** a-c The GSFSCs (left) and the viewing angle distributions (middle) of the global non-uniform refinement performed in cryoSPARC before any local refinement, and the FSC model-map performed in PHENIX (right) for each structure are shown.



**Supplementary Fig. 4. Pore analyses of all structures. a-d** Atomic models overlapped with the permeation path calculated using HOLE (illustrated as green dots for diameter greater than 2 Å and red dots for diameter less than 2 Å) for closed PKA-phosphorylated WT RyR2 (**a**), open PKA-phosphorylated WT RyR2 (**b**), primed PKA-phosphorylated RyR2-R420Q (**c**), and closed PKA-phosphorylated RyR2-R420Q + ARM210 (**d**). **e** Aligned atomic models of all closed/primed structures focusing on the pore and TM domain. **f** Pore radii estimation for each structure calculated with HOLE. Channel coordinates are arbitrary. Atomic model alignment and HOLE analyses suggest that no significant differences are found in the pore of the closed states. Only the sidechain of residue Q4863 seems to fluctuate, but probably because of the weak cryo-EM density resulting from the expected dynamic behavior of the solvent-exposed polar sidechain. **g-j** same as **e,f** but with the RyR2-S2808D (**g,h**) and the RyR2-R420W open states (**i,j**).



**Supplementary Fig. 5. Calstabin binding site in different models.** **a** Atomic model of RyR2 showing calstabin-2 (white ribbons), calstabin-2 interacting RyR2 domains (NSol in light blue, SPRY1 in green, SPRY3 in pink, and JSol in yellow), and RyR2-calstabin-2 interacting surface (orange). **b,c** Atomic models of the calstabin-2 interacting RyR2 domains in the closed state

(PDB:7UA5, colors) and in the open state (PDB: 7UA9, grey). Models are aligned on the JSol (**b**) and SPRY1-3 (**c**) domains. Relative inter-domain motions are shown with arrows. **d** Atomic models of the calstabin-2 interacting RyR2 domains of human WT RyR2 in the closed state (PDB:7UA5, colors) and RyR2-S2808D in the primed state without calstabin-2 (PDB:8UQ5, grey). Models are aligned in the JSol. Relative inter-domain motions are shown with arrows. **e** Same as **d** but of pig RyR2 in the closed state without calstabin-2 (PDB:5GO9, grey) and pig RyR2 in the open state without calstabin-2 (PDB:5GOA, yellow). **f** Same as **d** but of pig RyR2 in the closed state with calstabin-2 (PDB:6JI8, grey) and pig RyR2 in the open state with calstabin-2 (PDB:6JRR, yellow). **g** Same as **d** but of pig RyR1 in the closed state (PDB:6W1N, grey) and pig RyR1-R615C in the primed state (PDB:6X34, yellow).



**Supplementary Fig. 6. Structures of the complexes between RyRs and calstabins. a** Overlapped atomic models of calstabin-1 (PDB: 7TZC, orange) and calstabin-2 (PDB: 7UA5, magenta) showing their almost identical backbone structure. Unconserved residues are colored (yellow). **b** Sequence alignment of human calstabin-1 (FKBP1A) and calstabin-2 (FKBP1B). Only the four unconserved residues that interact with RyRs are colored (red). **c-f** Atomic models of RyR2 and calstabin-2 (**c**), RyR2 and calstabin-1 (**d**), RyR1 and calstabin-1 (**e**), and RyR1 and calstabin-2 (**f**). Models are aligned on the calstabins models. Potential interaction (H-bond, repulsion, and attraction) and potential interacting residues between RyRs and calstabins are shown for RyR1 (N1296, Q1299, H1300, and N1545), RyR2 (E1309 and E1312), calstabin-1 (E32 and D33), and calstabin-2 (Q32 and N33).



**Supplementary Fig. 7. Purification of recombinant human RyR2.** **a,c** Immunoblot (top) and SDS-PAGE (bottom) of purification of human recombinant RyR2-R420Q (**a**) and RyR2-R420W (**c**) expressed in HEK293 cells. **b,d** Ratio of normalized intensities of the pS2808 and total RyR2 bands. After PKA phosphorylation, the intensity increases ~3-fold (**b**) and ~2-fold (**d**), reaching a saturation point.



**Supplementary Fig. 8. Cryo-EM reconstructions of human RyR2 shows that the mutation-induced “primed” state is reversed by treatment with the Rycal ARM210.** **a** Overlapped models of closed PKA-phosphorylated RyR2 (grey) and primed PKA-phosphorylated RyR2-R420Q (magenta). The arrows show that the cytoplasmic shell of the channel shifts downward-outward when going from the closed to the primed state. **b** Same as **a** but with primed PKA-phosphorylated RyR2-R420W (magenta). **c** Overlapped models of primed PKA-phosphorylated RyR2-R420Q (magenta) and closed PKA-phosphorylated RyR2-R420Q in the presence of ARM210 (cyan). The arrows show that the cytoplasmic shell of the channel shifts upward-inward when going from the primed to the closed state. **d** Same as **c** but with primed PKA-phosphorylated RyR2-R420W (magenta) and closed PKA-phosphorylated RyR2-R420W + ARM210 (cyan). **e** Cryo-EM maps of local refinement cryoSPRAC jobs of primed PKA-phosphorylated RyR2-R420Q (magenta), and closed PKA-phosphorylated RyR2-R420Q + ARM210 (cyan). For better interpretation, a softening gaussian was applied to the cryo-EM maps. Interaction between BSol1 and RY1&2, and ARM210 densities are labelled. **f** Same as **e** but with primed PKA-phosphorylated RyR2-R420W (magenta), and closed PKA-phosphorylated RyR2-R420W + ARM210 (cyan). **g** Aligned models of primed PKA-phosphorylated RyR2-R420Q (magenta), and closed PKA-phosphorylated RyR2-R420Q + ARM210 (cyan). Conformational changes of the RY1&2 and BSol domains are shown with arrows. ATP + ARM210 are labelled. **h** Same as **g** but with primed PKA-phosphorylated RyR2-R420W (magenta), and closed PKA-phosphorylated RyR2-R420W + ARM210 (cyan).



**Supplementary Fig. 9. R420Q-induced rotation of the NTD-B domain disrupts interaction with the CSol and NTD-A\* domains.** a-d Aligned models focused on the NTD-B and CSol domains of closed PKA-phosphorylated WT RyR2 (PDB:7U9Q, grey), open PKA-phosphorylated WT RyR2 (PDB:7U9R, yellow), and primed PKA-phosphorylated RyR2-R420Q (PDB:8UXC,

magenta). Models were aligned at the NSol domain. Interdomain interactions are shown (dashed double arrow). Conformational changes are shown with arrows. Residues and distances stabilizing interdomain interactions are labelled. **e-h** Same as **a-d** but focusing on the interaction between the NTD-B and NTD-A<sup>-</sup> domains. NTD-A<sup>-</sup> stands for the NTD-A domain of the neighbor protomer.

| Variant        | Onset age |      |       | koff  | Kd  | kon    |
|----------------|-----------|------|-------|-------|-----|--------|
|                | Average   | SD   | Count |       |     |        |
| Arg2474Ser/Gly | 7.4       | 4.5  | 8     | 0.095 | 232 | 407370 |
| Ser2246Leu     | 8.7       | 4.8  | 18    | 0.076 | 185 | 410636 |
| Arg420Gln      | 14.1      | 11.1 | 27    | 0.075 | 160 | 469200 |
| Arg4959Gln     | 14.9      | 10.0 | 12    | 0.079 | 183 | 430215 |
| Arg420Trp      | 20.1      | 7.3  | 12    | 0.071 | 168 | 407370 |
| Glu4076Lys     | 29.7      | 20.6 | 3     | 0.061 | 151 | 400362 |
| Arg3570Trp     | 36.0      | 26.9 | 2     | 0.064 | 155 | 415632 |
| WT             | 60.0      | *    | *     | 0.043 | 105 | 406991 |

**Supplementary Fig. 10. Calstabin binding site in different models.** Table of the analyzed variants from the database,<sup>53</sup> showing average, standard deviation (SD), and number of patients (count) of onset age and diagnosis age. Also, included the  $k_{on}$  ( $M^{-1} \cdot min^{-1}$ ),  $k_{off}$  ( $min^{-1}$ ), and  $K_d$  (nM) of the recombinant RyR2 variants expressed in HEK293 cells.



**Supplementary Fig. 11. RyR2-R420W increased sensitivity to Ca<sup>2+</sup> is partially reversed by accessory protein CaM.** **a** Overlapped models of primed PKA-phosphorylated RyR2-R420W + Ca<sup>2+</sup> (PDB:8UXH, magenta) and open PKA-phosphorylated RyR2-R420W + Ca<sup>2+</sup> (PDB:8UXI, yellow). The arrows show that the cytoplasmic shell of the channel shifts downward-outward when going from the primed to the open state. To facilitate visualization only the front protomer is shown in colors, while the other three protomers are shown as grey transparent volumes. The positions of the sarcoplasmic reticulum membranes are shown as black discs. **b** Overlapped models of primed PKA-phosphorylated RyR2-R420W + Ca<sup>2+</sup> + CaM (PDB:8UXL, cyan) and open PKA-phosphorylated RyR2-R420W + Ca<sup>2+</sup> + CaM (PDB:8UXM, green). The arrows show that the

cytoplasmic shell of the channel shifts downward-outward when going from the primed to the open state, even in the presence of CaM. **c** Overlapped models of open PKA-phosphorylated RyR2-R420W + Ca<sup>2+</sup> (PDB:8UXI, yellow) and open PKA-phosphorylated RyR2-R420W + Ca<sup>2+</sup> + CaM (PDB:8UXM, green). The arrows show that the cytoplasmic shell of the channel shifts upward-inward in the presence of CaM, suggesting CaM has a stabilizing effect even in the open state. **d-f** Different views of the model of primed PKA-phosphorylated RyR2-R420W + Ca<sup>2+</sup> + CaM (PDB:8UXL) focused on the CaM binding site. Residues involved in protein-protein interactions and interdomain interactions are labelled.



**Supplementary Fig. 12. The proposed energy landscape explains the conformations and populations observed by cryo-EM. a-c** Schematic view of the dynamic energy landscape of conformational space of the cytoplasmic shell for WT RyR2 + calstabin-2 (black, **a**), PKA

phosphorylated RyR2-R420Q + calstabin-2 (magenta, **b**), and PKA phosphorylated RyR2-R420Q + calstabin-2 + ARM210 (cyan, **c**). Energy landscapes were estimated using the approach from Figure 5. The grey area represents the conformations populated at a level of energy set by conditions and temperature. The average conformation is showed as a dot and projected to the conformational axis, which is observed in cryo-EM. The relative position of the average conformations correlates to the average conformations observed in cryo-EM (black > cyan > magenta). The population in the open state is very low and undetectable by cryo-EM. However, bilayer experiments suggest the channels visit the open state, with an increased open probability in the CPVT channels. The increased open probability is explained here by a decreased of the activation energy ( $\Delta G^*$ ) compared to the WT and the ARM210 treated channels. **d,e** Same as **a** but with PKA phosphorylated RyR2-R420W + calstabin-2 +  $\text{Ca}^{2+}$  (yellow, **d**) and PKA phosphorylated RyR2-R420W + calstabin-2 +  $\text{Ca}^{2+}$  + CaM (green, **e**). In this case both the open and closed states are present in cryo-EM. The change in the energy landscape explains the upward-inward movements observed for the cryo-EM structures. In addition, the lower net energy difference ( $\Delta G$ ) explains the shift in population observed in the cryo-EM particles.



**Supplementary Fig. 13. 3D Variability Analysis of RyR2 variants.** **a-c** Principal mode of variability and particle count showing normal distribution for closed dephosphorylated RyR2 (**a**), primed RyR2-S2808D + Rapamycin (**b**), and open RyR2-R420W + Ca<sup>2+</sup> (**c**). **d** Schematic model of normal dynamics of RyR2 from the side and top views. **e** Representation of the cryo-EM particle count and the conformation of the cytoplasmic shell. Supplementary Figure 13d adapted from Marco C. Miotto et al., Structural analyses of human ryanodine receptor type 2 channels reveal the mechanisms for sudden cardiac death and treatment. *Sci. Adv.* 8,eabo1272(2022).DOI:10.1126/sciadv.abo1272 under a CC BY license: <https://creativecommons.org/licenses/by/4.0/>.<sup>10</sup>



**Supplementary Fig. 14. Representative local resolution maps.** Local refinement cryo-EM maps colored by local resolution shown for the RyR2-R2808D (8UQ2).



**Supplementary Fig. 15. Uncropped western blots. a** Uncropped western blots for supplementary figure 1. **b** Uncropped western blots for supplementary figure 7.

**Supplementary Table 1. Domain span for human RyR2.**

| Identification                   | Symbol | Residue Span                  |
|----------------------------------|--------|-------------------------------|
| Cytoplasmic shell                |        | (1-3633)                      |
| N-terminal domain                | NTD    | (1-639)                       |
| N-terminal domain A              | NTD-A  | (1-219)                       |
| N-terminal domain B              | NTD-B  | (220-408)                     |
| N-terminal solenoid              | NSol   | (409-639)                     |
| SPRY domain                      | SPRY   | (640-1646)                    |
| SP1a/ryanodine receptor domain 1 | SPRY1  | (640-861,1463-1483,1595-1646) |
| SP1a/ryanodine receptor domain 2 | SPRY2  | (1076-1255)                   |
| SP1a/ryanodine receptor domain 3 | SPRY3  | (1256-1462,1484-1594)         |
| RYR repeats 1 & 2                | RY1&2  | (862-1076)                    |
| Junctional solenoid              | JSol   | (1647-2108)                   |
| Bridging solenoid                | BSol   | (2109-3564)                   |
| Bridging solenoid 1              | BSol1  | (2109-2681,2916-3042)         |
| Bridging solenoid 2              | BSol2  | (3042-3344)                   |
| Bridging solenoid 3              | BSol3  | (3345-3564)                   |
| RYR repeats 3 & 4                | RY3&4  | (2682-2915)                   |
| Shell-core linker peptide        | SCLP   | (3565-3633)                   |
| Activation core and pore         |        | (3634-4967)                   |
| Core solenoid                    | CSol   | (3634-4130)                   |
| EF-hand pair                     | EF1&2  | (4016-4090)                   |
| Thumb and forefingers domain     | TaF    | (4131-4209)                   |
| Transmembrane domain             | TM     | (4237-4886)                   |
| Auxiliary intramembrane helices  | Sx     | (4237-4310)                   |
| Pseudo voltage sensor domain     | pVSD   | (4480-4750)                   |
| Channel pore domain              | Pore   | (4751-4886)                   |
| C-terminal domain                | CTD    | (4887-4967)                   |
| Zn-finger domain                 | ZnF    | (4887-4914)                   |

**Supplementary Table 2. Cryo-EM Statistics.**

| Sample                                       | RyR2-S2808D     | RyR2- S2808D +<br>ARM210 | RyR2- S2808D +<br>NOC-12/GSH | RyR2- S2808D +<br>Rapamycin |
|----------------------------------------------|-----------------|--------------------------|------------------------------|-----------------------------|
| State                                        | primed          | closed                   | primed                       | primed                      |
| <i>PDB ID</i>                                | 8UQ2            | 8UQ3                     | 8UQ4                         | 8UQ5                        |
| <i>EMDB ID</i>                               | EMD-42458       | EMD-42459                | EMD-42460                    | EMD-42461                   |
| <b>Data collection</b>                       |                 |                          |                              |                             |
| Microscope                                   | FEI Titan Krios | FEI Titan Krios          | FEI Titan Krios              | FEI Titan Krios             |
| Detector                                     | Gatan K3        | Gatan K3                 | Gatan K3                     | Gatan K3                    |
| Voltage (kV)                                 | 300             | 300                      | 300                          | 300                         |
| Magnification                                | 105,000         | 105,000                  | 105,000                      | 105,000                     |
| Exposure (e <sup>-</sup> /Å <sup>2</sup> )   | 58              | 58                       | 58                           | 58                          |
| Defocus range (μm)                           | -0.4 to -1.2    | -0.4 to -1.2             | -0.4 to -1.2                 | -0.4 to -1.2                |
| Pixel size (Å)                               | 0.83            | 0.83                     | 0.83                         | 0.83                        |
| <b>Processing</b>                            |                 |                          |                              |                             |
| Software                                     | cryoSPARC       | cryoSPARC                | cryoSPARC                    | cryoSPARC                   |
| Symmetry                                     | C4              | C4                       | C4                           | C4                          |
| Initial particles (N)                        | 267,550         | 137,303                  | 83,074                       | 320,951                     |
| Final particles (N)                          | 191,898         | 83,460                   | 19,753                       | 18,232                      |
| Global map resolution (Å)*                   | 2.98            | 3.18                     | 3.64                         | 3.96                        |
| Local maps resolution range (Å) <sup>‡</sup> | 2.79-3.79       | 2.92-4.16                | 3.22-5.63                    | 3.11-5.62                   |
| <b>Model Composition</b>                     |                 |                          |                              |                             |
| Peptide chains                               | 8               | 8                        | 8                            | 4                           |
| Nonhydrogen                                  | 138,608         | 138,700                  | 138,608                      | 135,336                     |
| Protein residues                             | 17,324          | 17,324                   | 17,324                       | 16,896                      |
| Ligands                                      | 12              | 16                       | 12                           | 12                          |
| <b>Mean B factors (Å<sup>2</sup>)</b>        |                 |                          |                              |                             |
| Protein                                      | 112.09          | 120.82                   | 151.90                       | 141.97                      |
| Ligands                                      | 161.25          | 179.93                   | 208.42                       | 192.77                      |
| <b>RMSD</b>                                  |                 |                          |                              |                             |
| Bond length (Å)                              | 0.003           | 0.003                    | 0.003                        | 0.003                       |
| Bond angles (°)                              | 0.746           | 0.732                    | 0.752                        | 0.720                       |
| <b>Ramachandran</b>                          |                 |                          |                              |                             |
| Favored (%)                                  | 97.16           | 97.04                    | 96.58                        | 97.31                       |
| Allowed (%)                                  | 2.77            | 2.92                     | 3.33                         | 2.60                        |
| Disallowed (%)                               | 0.07            | 0.05                     | 0.09                         | 0.10                        |
| <b>Validation</b>                            |                 |                          |                              |                             |
| MolProbity score                             | 1.72            | 1.77                     | 1.90                         | 1.72                        |
| Clashscore                                   | 11.30           | 12.18                    | 15.03                        | 11.81                       |
| Rotamer outliers (%)                         | 0.50            | 0.18                     | 0.24                         | 0.30                        |
| FSC model 0.5 (Å) <sup>#</sup>               | 2.99            | 3.13                     | 3.53                         | 3.43                        |

**Supplementary Table 2 continuation.**

| <b>Sample</b>                              | <b>RyR2-R420Q</b> | <b>RyR2-R420Q +ARM210</b> | <b>RyR2-R420W</b> | <b>RyR2-R420W + ARM210</b> |
|--------------------------------------------|-------------------|---------------------------|-------------------|----------------------------|
| State                                      | primed            | closed                    | primed            | closed                     |
| <i>PDB ID</i>                              | 8UXC              | 8UXE                      | 8UXF              | 8UXG                       |
| <i>EMDB ID</i>                             | EMD-42759         | EMD-42761                 | EMD-42762         | EMD-42763                  |
| <b>Data collection</b>                     |                   |                           |                   |                            |
| Microscope                                 | FEI Titan Krios   | FEI Titan Krios           | FEI Titan Krios   | FEI Titan Krios            |
| Detector                                   | Gatan K3          | Gatan K3                  | Gatan K3          | Gatan K3                   |
| Voltage (kV)                               | 300               | 300                       | 300               | 300                        |
| Magnification                              | 105,000           | 105,000                   | 105,000           | 105,000                    |
| Exposure (e <sup>-</sup> /Å <sup>2</sup> ) | 58                | 58                        | 58                | 58                         |
| Defocus range (μm)                         | -0.4 to -1.2      | -0.4 to -1.2              | -0.4 to -1.2      | -0.4 to -1.2               |
| Pixel size (Å)                             | 0.83              | 0.83                      | 0.83              | 0.83                       |
| <b>Processing</b>                          |                   |                           |                   |                            |
| Software                                   | cryoSPARC         | cryoSPARC                 | cryoSPARC         | cryoSPARC                  |
| Symmetry                                   | C4                | C4                        | C4                | C4                         |
| Initial particles (N)                      | 187,859           | 20,900                    | 115,505           | 206,663                    |
| Final particles (N)                        | 143,933           | 14,924                    | 102,478           | 181,724                    |
| Global map resolution (Å)*                 | 2.86              | 3.53                      | 3.13              | 3.08                       |
| Local maps resolution range (Å)†           | 2.64-3.35         | 3.10-5.02                 | 2.90-3.74         | 2.91-3.38                  |
| <b>Model Composition</b>                   |                   |                           |                   |                            |
| Peptide chains                             | 8                 | 8                         | 8                 | 8                          |
| Nonhydrogen                                | 138,600           | 138,692                   | 138,620           | 138,712                    |
| Protein residues                           | 17,324            | 17,324                    | 17,324            | 17,324                     |
| Ligands                                    | 12                | 16                        | 12                | 16                         |
| <b>Mean B factors (Å<sup>2</sup>)</b>      |                   |                           |                   |                            |
| Protein                                    | 110.19            | 129.90                    | 105.51            | 110.57                     |
| Ligands                                    | 147.54            | 258.08                    | 171.76            | 165.53                     |
| <b>RMSD</b>                                |                   |                           |                   |                            |
| Bond length (Å)                            | 0.003             | 0.004                     | 0.004             | 0.003                      |
| Bond angles (°)                            | 0.672             | 0.713                     | 0.697             | 0.720                      |
| <b>Ramachandran</b>                        |                   |                           |                   |                            |
| Favored (%)                                | 97.38             | 96.83                     | 97.62             | 97.67                      |
| Allowed (%)                                | 2.55              | 3.05                      | 2.34              | 2.28                       |
| Disallowed (%)                             | 0.07              | 0.12                      | 0.05              | 0.05                       |
| <b>Validation</b>                          |                   |                           |                   |                            |
| MolProbity score                           | 1.61              | 1.81                      | 1.62              | 1.58                       |
| Clashscore                                 | 9.29              | 12.83                     | 10.46             | 9.75                       |
| Rotamer outliers (%)                       | 0.03              | 0.37                      | 0.58              | 0.74                       |
| FSC model 0.5 (Å)#                         | 2.94              | 3.38                      | 3.08              | 3.20                       |

**Supplementary Table 2 continuation.**

| Sample                                     | RyR2-R420W + Ca <sup>2+</sup> |           | RyR2-R420W + Ca <sup>2+</sup> + CaM |           |
|--------------------------------------------|-------------------------------|-----------|-------------------------------------|-----------|
|                                            | primed                        | open      | primed                              | open      |
| State                                      | primed                        | open      | primed                              | open      |
| PDB ID                                     | 8UXH                          | 8UXI      | 8UXL                                | 8UXM      |
| EMDB ID                                    | EMD-42764                     | EMD-42765 | EMD-42768                           | EMD-42769 |
| <b>Data collection</b>                     |                               |           |                                     |           |
| Microscope                                 | FEI Titan Krios               |           | FEI Titan Krios                     |           |
| Detector                                   | Gatan K3                      |           | Gatan K3                            |           |
| Voltage (kV)                               | 300                           |           | 300                                 |           |
| Magnification                              | 105,000                       |           | 105,000                             |           |
| Exposure (e <sup>-</sup> /Å <sup>2</sup> ) | 58                            |           | 58                                  |           |
| Defocus range (µm)                         | -0.4 to -1.2                  |           | -0.4 to -1.2                        |           |
| Pixel size (Å)                             | 0.83                          |           | 0.83                                |           |
| <b>Processing</b>                          |                               |           |                                     |           |
| Software                                   | cryoSPARC                     |           | cryoSPARC                           |           |
| Symmetry                                   | C4                            |           | C4                                  |           |
| Initial particles (N)                      | 254,828                       |           | 134,776                             |           |
| Final particles (N)                        | 55,886                        | 149,448   | 77,625                              | 49,606    |
| Global map resolution (Å)*                 | 3.52                          | 3.29      | 3.12                                | 3.56      |
| Local maps resolution range (Å)‡           | 3.15-4.11                     | 3.01-3.82 | 2.88-5.03                           | 3.02-6.01 |
| <b>Model Composition</b>                   |                               |           |                                     |           |
| Peptide chains                             | 8                             | 8         | 12                                  | 12        |
| Nonhydrogen                                | 131,656                       | 131,656   | 143,500                             | 143,500   |
| Protein residues                           | 16,444                        | 16,444    | 17,928                              | 17,928    |
| Ligands                                    | 16                            | 16        | 32                                  | 32        |
| <b>Mean B factors (Å<sup>2</sup>)</b>      |                               |           |                                     |           |
| Protein                                    | 158.66                        | 130.95    | 129.59                              | 134.13    |
| Ligands                                    | 338.76                        | 234.58    | 197.73                              | 205.78    |
| <b>R.m.s. deviations</b>                   |                               |           |                                     |           |
| Bond length (Å)                            | 0.004                         | 0.003     | 0.004                               | 0.011     |
| Bond angles (°)                            | 0.854                         | 0.825     | 0.881                               | 0.751     |
| <b>Ramachandran</b>                        |                               |           |                                     |           |
| Favored (%)                                | 97.05                         | 96.77     | 96.82                               | 97.09     |
| Allowed (%)                                | 2.85                          | 3.15      | 3.09                                | 2.82      |
| Disallowed (%)                             | 0.10                          | 0.07      | 0.09                                | 0.09      |
| <b>Validation</b>                          |                               |           |                                     |           |
| MolProbity score                           | 1.94                          | 1.90      | 1.92                                | 1.75      |
| Clashscore                                 | 13.01                         | 12.67     | 13.79                               | 11.89     |
| Rotamer outliers (%)                       | 1.58                          | 1.28      | 1.25                                | 0.74      |
| FSC model 0.5 (Å)#                         | 3.58                          | 3.27      | 3.22                                | 3.32      |

\* Map resolution of the non-uniform refinement determined by CryoSPARC before local masks.

‡ Map resolution range represents the range determined by local refinements in cryoSPARC using the masks described in Methods.

# Value obtained from Phenix validation tool.
